# Supplementary material for: Nanoparticle labelling-based magnetic immunoassay on chip combined with electrothermal vaporization - inductively coupled plasma mass spectrometry for the determination of carcinoembryonic antigen in human serum
Source: Royal Society of Chemistry journal article supplement (doi:10.1039/c1an15387k), 2011-01-01
Supplement: c1an15387k.pdf [file c1an15387k.pdf]

# Nanoparticle Labelling-based Magnetic Immunoassay on Chip Combined with Electrothermal Vaporization – Inductively Coupled Plasma Mass Spectrometry for the Determination of Carcinoembryonic Antigen in Human Serum

Beibei Chen, Bin Hu\*, Ping Jiang, Man He, Hanyong Peng, Xing Zhang

*Key Laboratory of Analytical Chemistry for Biology and Medicine (Ministry of Education),*

*Department of Chemistry, Wuhan University, Wuhan 430072, China*

\*Corresponding author: Dr. Bin Hu, E-mail: binhu @ whu.edu.cn, Fax: 86-27-68754067

*Contents:*

Figures S-1 to S-5

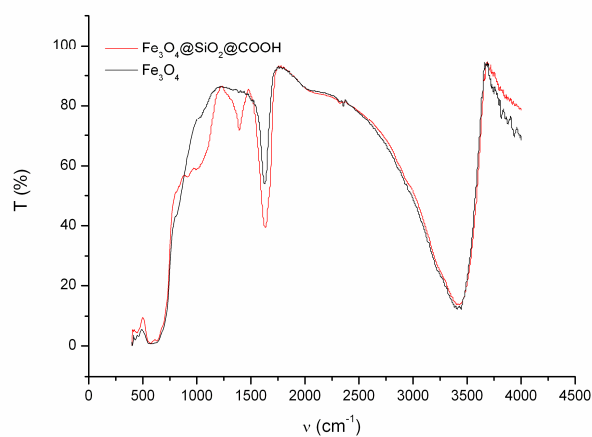

**Figure S-1** FT-IR of IDA-SCMNPs

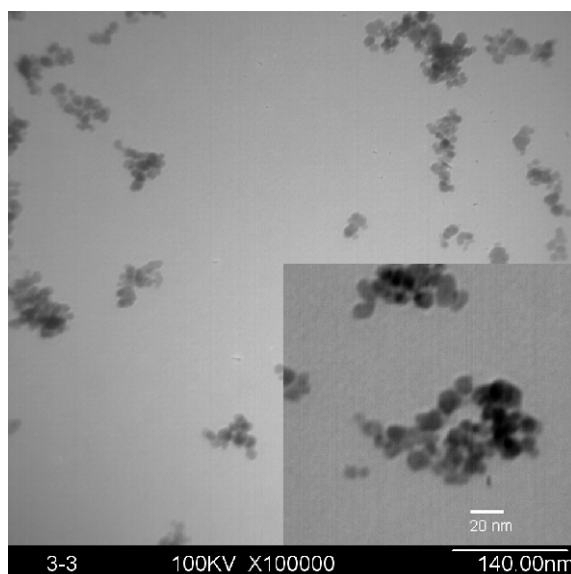

Figure S-2 TEM of IDA-SCMNPs

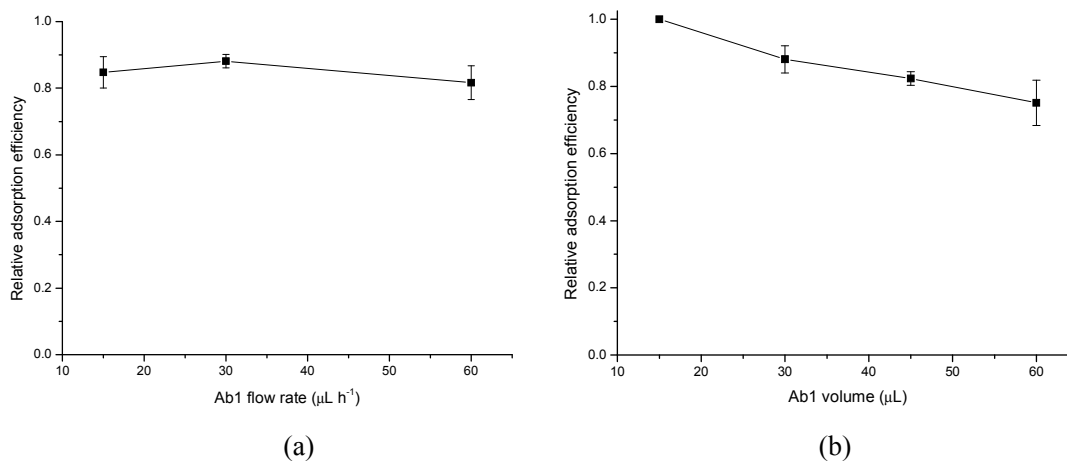

Figure S-3 Effect of Ab1 flow rate (a) and volume (b)

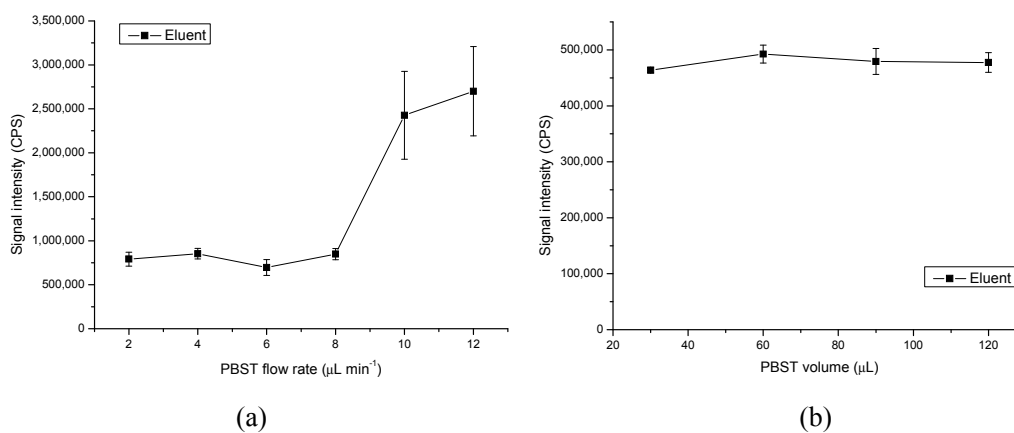

Figure S-4 Effect of PBST flow rate (a) and volume (b). (Blocking: 5% (m/v) BSA, 60  $\mu\text{L}$ , 8  $\mu\text{L min}^{-1}$ ; other experimental conditions seen in Fig. 4)

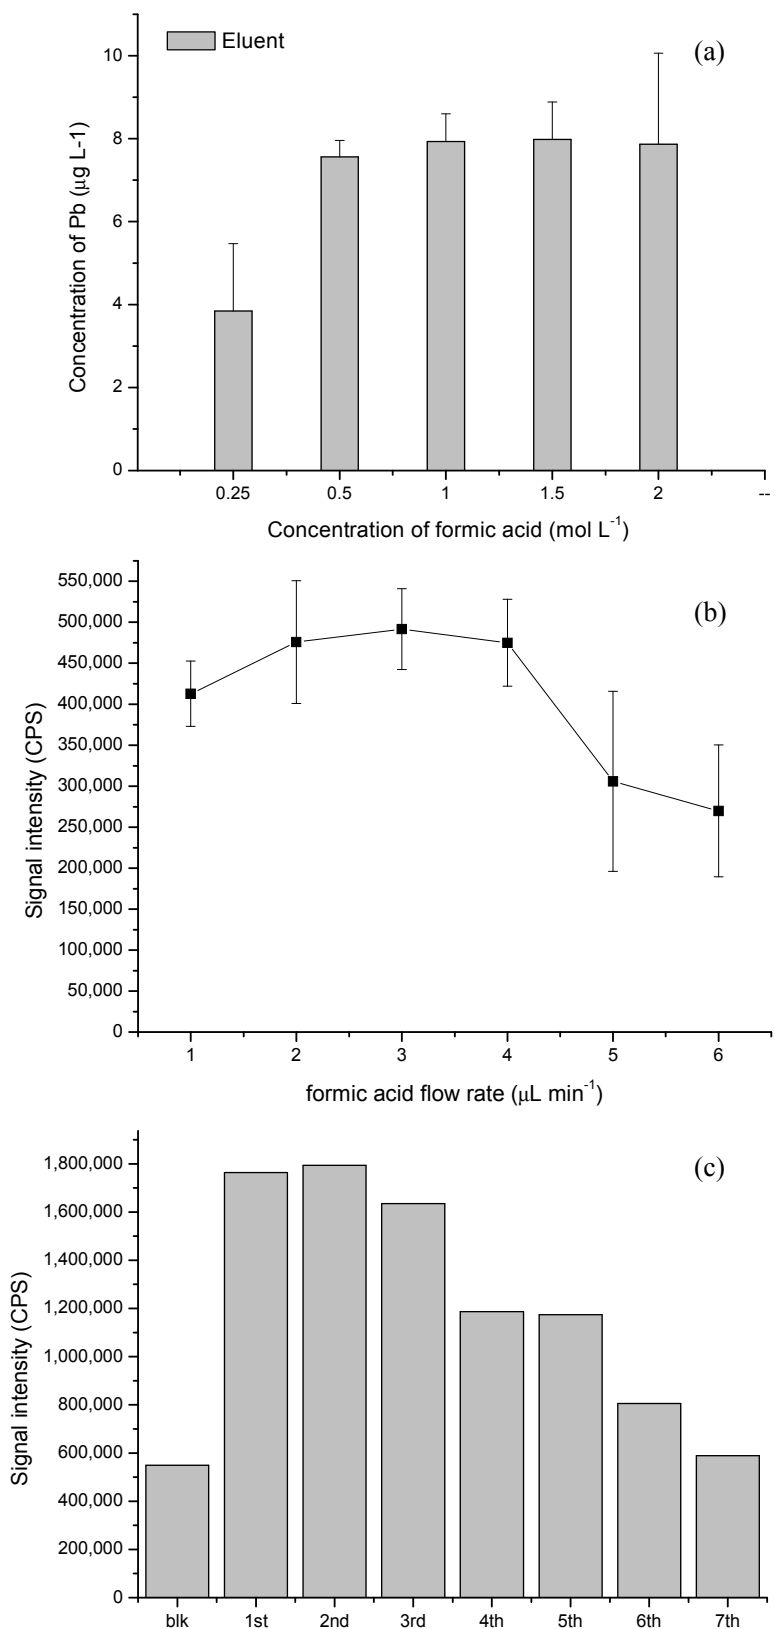

**Figure S-5** Effect of the concentration (a), flow rate (b) and volume (c) of formic acid.  
(Blocking: 5% (m/v) BSA, 60  $\mu\text{L}$ , 8  $\mu\text{L min}^{-1}$ ; Flushing: 0.5% (v/v) PBST, 30  $\mu\text{L}$ , 6  $\mu\text{L min}^{-1}$ ;  
other experimental conditions seen in Fig. 4)
